# Supplementary material for: Plasmonic and catalytic Au NBP@AgPd nanoframes for highly efficient photocatalytic reactions
Source: Royal Society of Chemistry journal article supplement (doi:10.1039/d3cp01153d), 2023-01-01
Supplement: d3cp01153d1.pdf [file d3cp01153d1.pdf]

## Electronic Supplementary Information

### Plasmonic and catalytic Au NBP@Pd nanoframes for highly efficient photocatalytic reactions

Juan Xu,<sup>a‡</sup> Haiying Xu,<sup>a,c‡</sup> Lihui Xu,<sup>a</sup> Qifeng Ruan,<sup>d</sup> Xingzhong Zhu,<sup>\*a,b</sup> Caixia Kan<sup>\*a,b</sup> and Daning Shi<sup>\*a,b</sup>

<sup>a</sup> College of Physics, Nanjing University of Aeronautics and Astronautics, Nanjing 211106, China. E-mail: xzzhu@nuaa.edu.cn; cxkan@nuaa.edu.cn; shi@nuaa.edu.cn

<sup>b</sup> MIIT Key Laboratory of Aerospace Information Materials and Physics, Nanjing University of Aeronautics and Astronautics, Nanjing 211106, China.

<sup>c</sup> College of Mathematics and Physics, Nanjing Institute of Technology, Nanjing, 211167, China.

<sup>d</sup> Engineering Product Development, Singapore University of Technology and Design, Singapore 487372, Singapore

### Supplementary figures

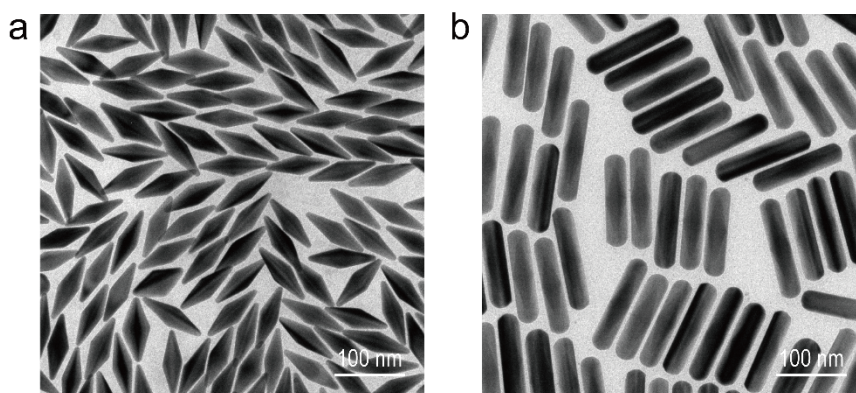

**Fig. S1** (a) TEM image of Au NBPs with average waist width of  $21 \pm 1$  nm and length of  $69 \pm 3$  nm. (b) TEM image of the Au NBP@Ag nanorods with average diameter of  $24 \pm 1$  nm and length of  $105 \pm 4$  nm.

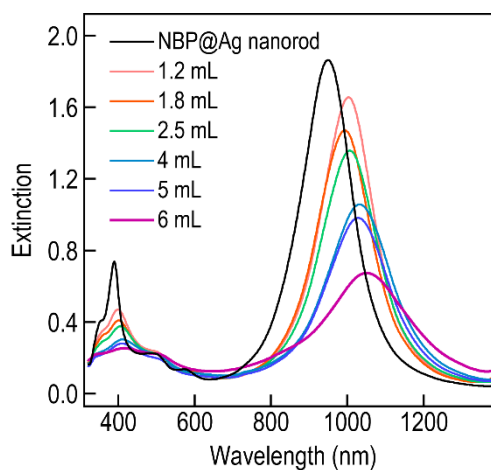

**Fig. S2** Extinction spectra of the Au NBP@Ag nanorods (black) and Au NBP@Ag@Pd nanorods samples that fabricated with different volume of Pd precursor.

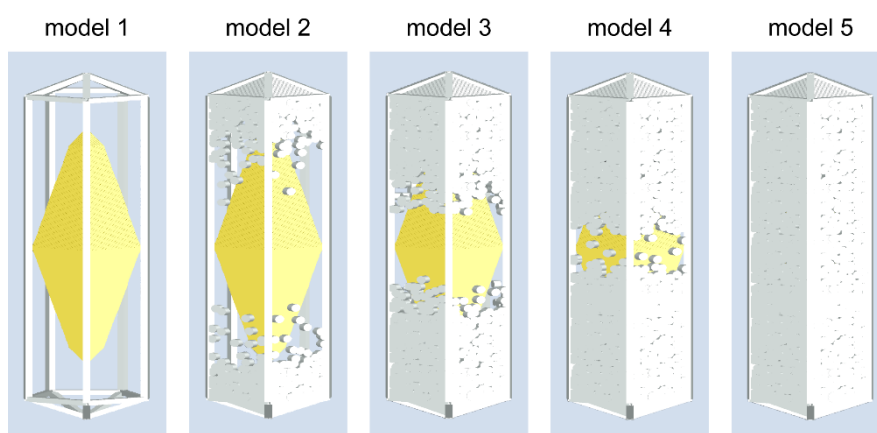

**Fig. S3** Schematic models utilized in the FDTD simulations.

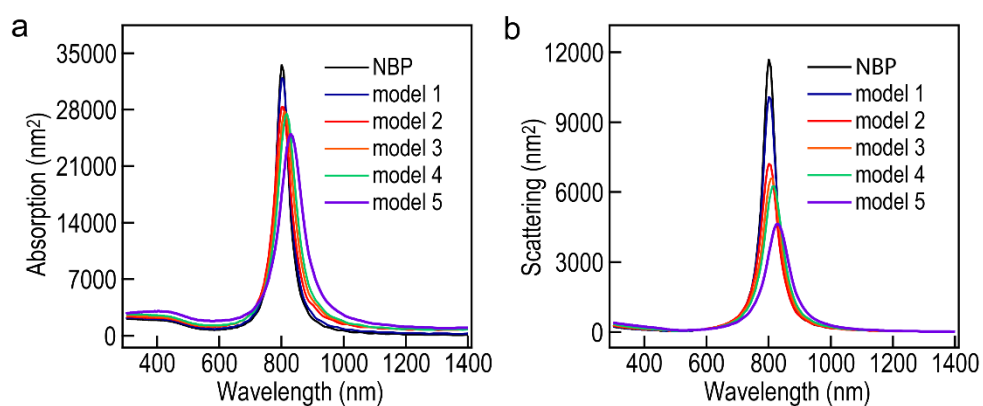

**Fig. S4** Simulated (a) absorption and (b) scattering spectra of the Au NBP and the models.

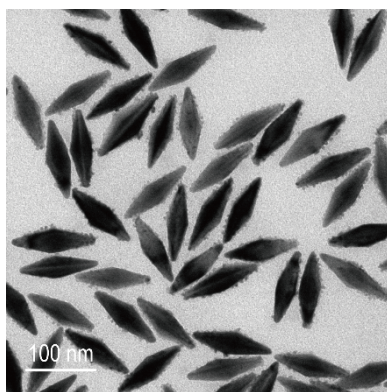

**Fig. S5** TEM image of the Au NBP@AgPd core-shell nanoparticles.

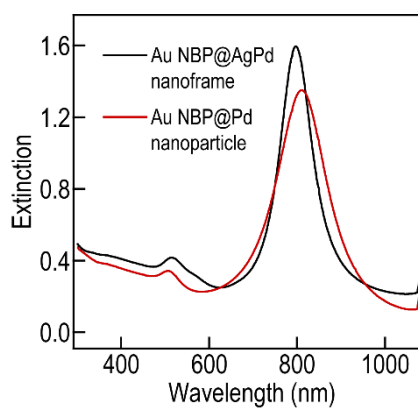

**Fig. S6** Extinction spectra of the Au NBP@AgPd nanoframe (black) and Au NBP@Pd core-shell nanoparticle (red) samples.

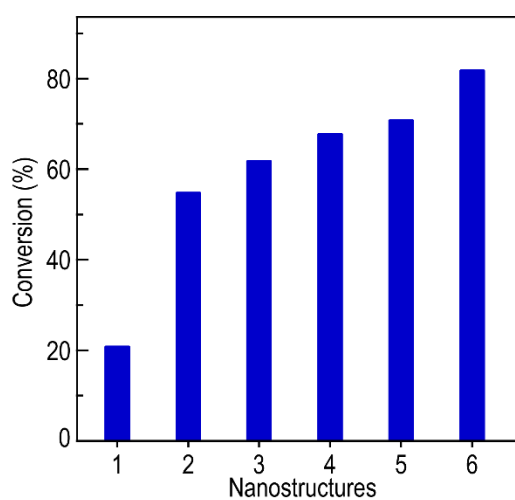

**Fig. S7** Plasmonic photocatalytic activities of the Au NBP@Pd nanostructures under the irradiation of an 808 nm laser with same optical intensity of 6W. The 1 to 6 nanostructure samples were corresponding to the Au NBP@AgPd nanostructures in Fig. 1c-h.

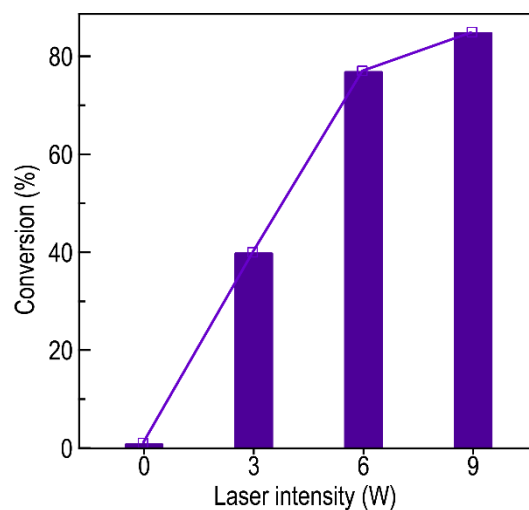

**Fig. S8** Plasmonic photocatalytic activities of the Au NBP@AgPd nanoframe under the irradiation of an 808 nm laser at different optical intensities.

Table S1 The content of Au and Pd elements in Au NBP@AgPd nanoframe and Au NBP@Pd nanoparticle samples

|                        | Au ( $\mu\text{g mL}^{-1}$ ) | Pd ( $\mu\text{g mL}^{-1}$ ) |
|------------------------|------------------------------|------------------------------|
| Au NBP@AgPd nanoframe  | 0.14                         | 0.15                         |
| Au NBP@Pd nanoparticle | 0.83                         | 0.48                         |
